# Supplementary material
Source: publisher figshare collection journal article supplement (https://acs.figshare.com/ndownloader/files/7010936)
Supplement: Supplementary file 1 [file 7010936]

## Supporting Information

### Sequential Vapor Infiltration Treatment Enhances the Ionic Current Rectification Performance of Composite Membranes Based on Mesoporous Silica Confined in Anodic Alumina

Yanyan Liang, Zhengping Liu\*

Beijing Key Laboratory of Materials for Energy Conversion and Storage, BNU Key Laboratory of Environmentally Friendly and Functional Polymer Materials, College of Chemistry, Beijing

Normal University, Beijing 100875, P. R. China

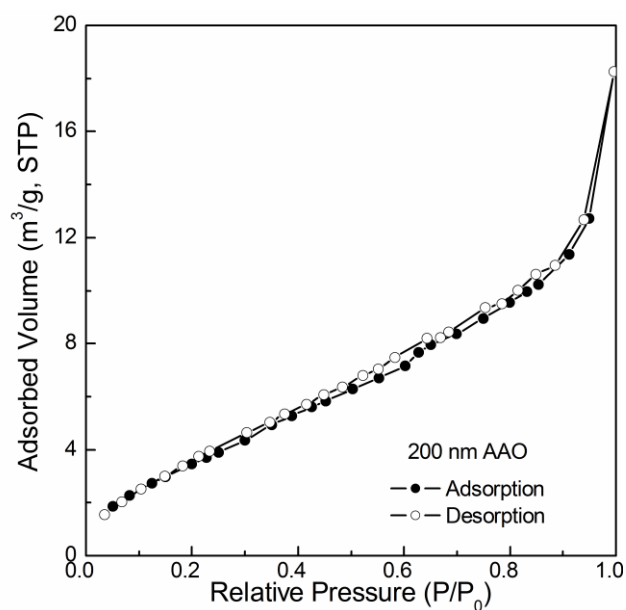

Figure S1. N<sub>2</sub> Adsorption and desorption isotherm of 200 nm AAO membrane.

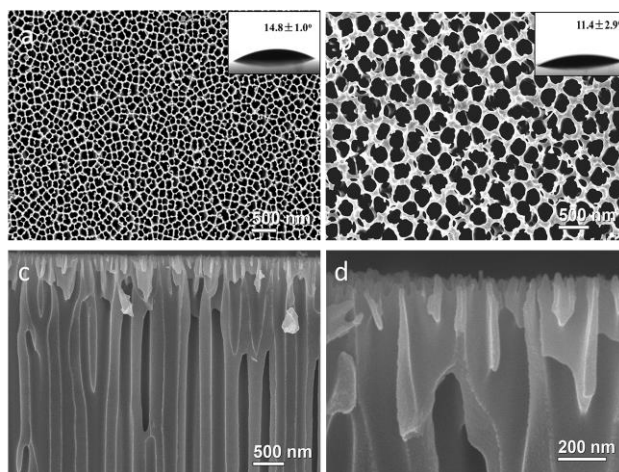

Figure S2. SEM images of 200 nm AAO membrane. (a) The tip surface, (b) the base surface, (c) cross sectional view, (d) magnified cross sectional view.

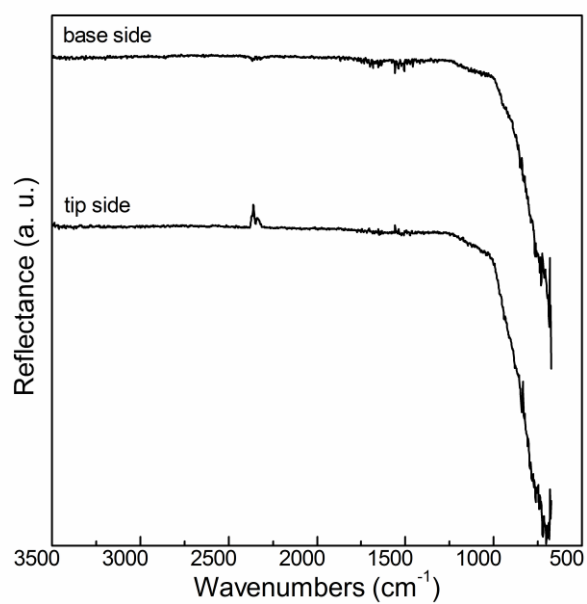

Figure S3. FT-IR spectra of the tip side and base side of 200 nm AAO membrane.

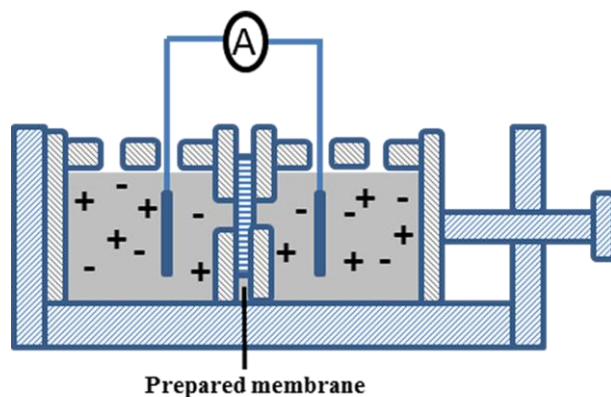

Figure S4. Schematic illustration of the ionic current measurement setup.

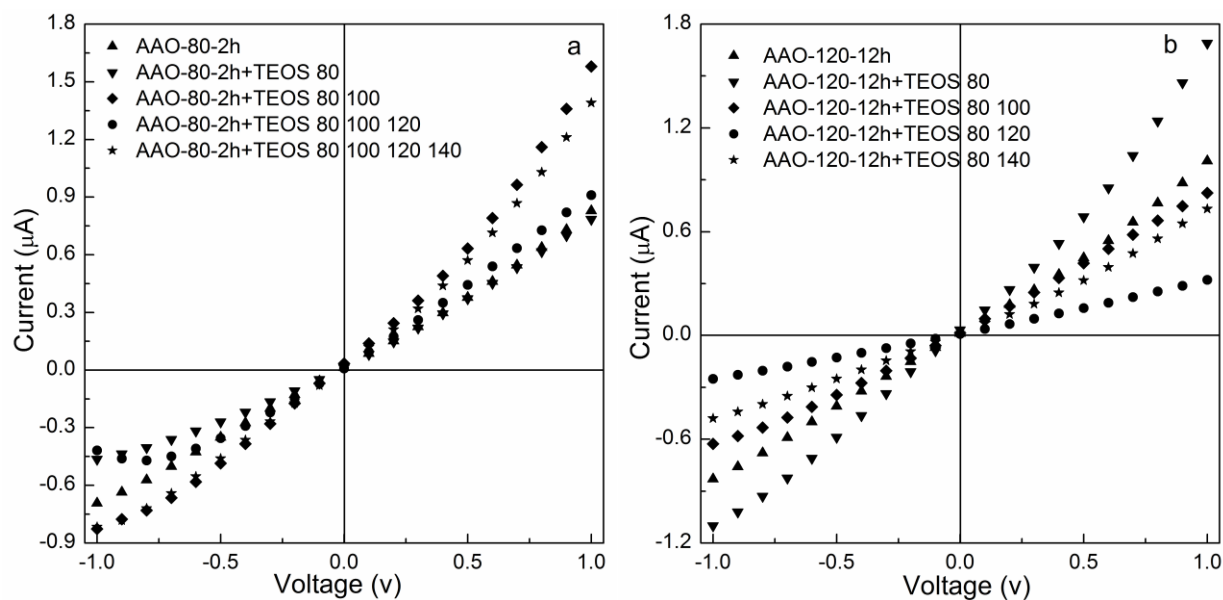

Figure S5. I-V curves of reference membranes prepared by the VPS process without SDAs after SVI treatment. (a) CTAB as the SDA, (b) P123 as the SDA.

Table S1. Summary of structural parameters of prepared membranes before and after SVI treatment

| entry               | BET surface area<br>(m <sup>2</sup> /g) | pore volume<br>(cm <sup>3</sup> /g) | BJH pore diameter<br>(nm) |
|---------------------|-----------------------------------------|-------------------------------------|---------------------------|
| 200 nm AAO          | 14.8                                    | <sup>a</sup>                        | <sup>a</sup>              |
| AAO-C18-80-2h       | 49.4                                    | 0.083                               | 3.2                       |
| AAO-C18-80-2h-SVI   | 48.9                                    | 0.058                               | 3.6                       |
| AAO-P35-120-12h     | 26.0                                    | 0.057                               | 2.2                       |
| AAO-P35-120-12h-SVI | 23.8                                    | 0.055                               | 1.9                       |

<sup>a</sup>, Adsorbed volumes are too low to be calculated.
